## ANESTHESIOLOGY

# Isoflurane Modulates Hippocampal Cornu Ammonis Pyramidal Neuron Excitability by Inhibition of Both Transient and Persistent Sodium Currents in Mice

Wenling Zhao, M.D., Mingyue Zhang, M.B.,  
Jin Liu, M.D., Peng Liang, M.D., Rurong Wang, M.D., Ph.D.,  
Hugh C. Hemmings, M.D., Ph.D., Cheng Zhou, Ph.D.

ANESTHESIOLOGY 2019; 131:94–104

Although general anesthetics have been used clinically for more than 170 yr, their molecular and cellular mechanisms of action are still not clear. Compared with intravenous general anesthetics like propofol, the molecular mechanisms of volatile anesthetics such as isoflurane and sevoflurane are more complex because they interact with multiple molecular targets.<sup>1,2</sup> Volatile anesthetics produce the desirable pharmacologic endpoints of amnesia, unconsciousness, and immobility, but also unwanted side effects including respiratory and cardiovascular depression and developmental neurotoxicity.<sup>3–5</sup> Therefore, understanding the various molecular targets that contribute to specific desired and undesired endpoints is important for a complete pharmacologic understanding and for development of novel anesthetics with improved safety profiles.

Volatile anesthetics depress neurotransmitter release with greater potency at excitatory than inhibitory synapses, which contributes to volatile anesthetic depression of central nervous system function.<sup>6</sup> Volatile anesthetics at clinically relevant concentrations inhibit sodium currents in transfected cells,<sup>7,8</sup> nerve terminals,<sup>8,9</sup> and dorsal root ganglion neurons.<sup>10</sup> Voltage-gated sodium channels are important targets for the presynaptic effects of volatile anesthetics on

## ABSTRACT

**Background:** Volatile anesthetics inhibit presynaptic voltage-gated sodium channels to reduce neurotransmitter release, but their effects on excitatory neuron excitability by sodium current inhibition are unclear. The authors hypothesized that inhibition of transient and persistent neuronal sodium currents by the volatile anesthetic isoflurane contributes to reduced hippocampal pyramidal neuron excitability.

**Methods:** Whole-cell patch-clamp recordings of sodium currents of hippocampal cornu ammonis pyramidal neurons were performed in acute mouse brain slices. The actions of isoflurane on both transient and persistent sodium currents were analyzed at clinically relevant concentrations of isoflurane.

**Results:** The median inhibitory concentration of isoflurane for inhibition of transient sodium currents was  $1.0 \pm 0.3$  mM ( $\sim 3.7$  minimum alveolar concentration [MAC]) from a physiologic holding potential of  $-70$  mV. Currents from a hyperpolarized holding potential of  $-120$  mV were minimally inhibited (median inhibitory concentration =  $3.6 \pm 0.7$  mM,  $\sim 13.3$  MAC). Isoflurane ( $0.55$  mM;  $\sim 2$  MAC) shifted the voltage-dependence of steady-state inactivation by  $-6.5 \pm 1.0$  mV ( $n = 11$ ,  $P < 0.0001$ ), but did not affect the voltage-dependence of activation. Isoflurane increased the time constant for sodium channel recovery from  $7.5 \pm 0.6$  to  $12.7 \pm 1.3$  ms ( $n = 13$ ,  $P < 0.001$ ). Isoflurane also reduced persistent sodium current density (median inhibitory concentration =  $0.4 \pm 0.1$  mM,  $\sim 1.5$  MAC) and resurgent currents. Isoflurane ( $0.55$  mM;  $\sim 2$  MAC) reduced action potential amplitude, and hyperpolarized resting membrane potential from  $-54.6 \pm 2.3$  to  $-58.7 \pm 2.1$  mV ( $n = 16$ ,  $P = 0.001$ ).

**Conclusions:** Isoflurane at clinically relevant concentrations inhibits both transient and persistent sodium currents in hippocampal cornu ammonis pyramidal neurons. These mechanisms may contribute to reductions in both hippocampal neuron excitability and synaptic neurotransmission.

(ANESTHESIOLOGY 2019; 131:94–104)

## EDITOR'S PERSPECTIVE

## What We Already Know about This Topic

- Neurotransmitter release from presynaptic nerve terminals is hindered by volatile anesthetics through inhibition of voltage-gated sodium channels
- Depression of neuronal activity by volatile anesthetics through direct inhibition of sodium currents in excitatory neurons has not been previously reported

## What This Article Tells Us That Is New

- Electrophysiologic studies show that isoflurane, at clinically relevant concentrations, inhibits both transient and persistent sodium currents on mouse cornu ammonis hippocampal neurons *ex vivo*
- The isoflurane-induced inhibition of sodium channels on excitatory neurons may contribute to the reduction of neuronal excitability and synaptic transmission

This study was presented as an abstract at the October 13–17, 2018 annual meeting of the American Society of Anesthesiologists, San Francisco, California. W.Z. and M.Z. contributed equally to this article.

Submitted for publication September 17, 2018. Accepted for publication March 22, 2019. From the Laboratory of Anesthesia and Critical Care Medicine, Translational Neuroscience Center (W.Z., M.Z., J.L., C.Z.) and Department of Anesthesiology (W.Z., M.Z., J.L., P.L., R.W., C.Z.), West China Hospital of Sichuan University, Chengdu, Sichuan, China; and Departments of Anesthesiology and Pharmacology, Weill Cornell Medicine, New York, New York (H.C.H.).

Copyright © 2019, the American Society of Anesthesiologists, Inc. All Rights Reserved. Anesthesiology 2019; 131:94–104. DOI: 10.1097/ALN.0000000000002753

excitatory neurotransmitter release.<sup>11,12</sup> However, whether volatile anesthetics can directly depress activity of excitatory neurons by inhibiting sodium currents is unclear.

Initiation and propagation of action potentials are important for synaptic transmission and neuronal plasticity.<sup>13</sup> Even a small change in action potential properties can lead to significant modulation of synaptic transmission.<sup>14</sup> Transient sodium currents are crucial for membrane excitability, including initiation and propagation of action potentials.<sup>13</sup> Voltage-gated sodium channels can also produce persistent and resurgent sodium currents to modulate excitability of neuronal networks.<sup>15,16</sup> Slowly inactivating or non-inactivating sodium currents (persistent sodium currents) are activated at sub-threshold voltages and enhance repetitive firing.<sup>17</sup> Resurgent sodium currents occur with repolarization after a previous period of depolarization; neurons with significant resurgent sodium currents share the capacity for rapid spontaneous firing or burst firing.<sup>16</sup> Changes in persistent or resurgent sodium currents are implicated in several diseases including epilepsy, paramyotonia congenita, and extreme pain syndromes.<sup>17,18</sup> However, whether volatile anesthetics directly modulate persistent sodium currents and/or resurgent sodium currents is unknown.

The hippocampus is critical to many brain functions including learning and memory,<sup>19</sup> which are sensitive to the actions of general anesthetics.<sup>20–22</sup> Pyramidal neurons are the principal excitatory neurons in the hippocampus and express multiple subtypes of voltage-gated sodium channels.<sup>23</sup> We designed the present study to test the hypothesis that the volatile anesthetic isoflurane directly modulates excitability of hippocampal pyramidal neurons by inhibiting both transient and persistent sodium currents.

## Materials and Methods

### Materials

Working solutions of isoflurane were prepared from saturated solutions (12 to 15 mM isoflurane, as measured by gas chromatography<sup>24</sup>) in extracellular solution consisting of (in mM) 125 NaCl, 25 NaHCO<sub>3</sub>, 1.25 NaH<sub>2</sub>PO<sub>4</sub>, 2.5 KCl, 1 MgCl<sub>2</sub>, 2 CaCl<sub>2</sub>, and 15 glucose, pH = 7.3 ± 0.5. The saturated solution was prepared by rotation in a gas-tight vial for at least 24 h. The saturated solution was diluted to experimental concentrations immediately before perfusion, and final concentrations of isoflurane were confirmed by gas chromatography.<sup>24</sup> Isoflurane 0.27 mM was used as the predicted minimum alveolar concentration (MAC, equivalent to the EC<sub>50</sub> for immobilization) for mouse adjusted to room temperature (~25°C).<sup>25–27</sup> Isoflurane was purchased from Abbott Pharmaceutical Co. Ltd. (China), tetrodotoxin was purchased from Alomone Labs (Israel), and other compounds were obtained from Sigma-Aldrich (China).

### Preparation of Mouse Hippocampal Slices

Procedures were approved by the Animal Ethics Committee of Sichuan University (Chengdu, China). Randomization

and blinding methods were not used in these electrophysiologic recordings. C57BL/6 mice (28 male and 25 female, 53 in total) at 7 to 10 postnatal days were anesthetized with ketamine/xylazine (60/10 mg/kg) and decapitated. The brain was rapidly removed and put into ice-cold oxygenated (95% O<sub>2</sub>/5% CO<sub>2</sub>) sucrose-substituted dissecting solution containing (in mM): 87 NaCl, 25 NaHCO<sub>3</sub>, 1.25 NaH<sub>2</sub>PO<sub>4</sub>, 2.5 KCl, 7.5 MgCl<sub>2</sub>, 75 sucrose, and 25 glucose. Horizontal hippocampal slices (thickness of 270 μm) were cut using a vibratome (Leica VT1000 A, USA), then incubated for 30 min at 37°C and then at room temperature (23° to 25°C) in extracellular solution aerated with 95% O<sub>2</sub>/5% CO<sub>2</sub>. After incubation, hippocampal slices were mounted in the recording chamber for electrophysiologic recordings at room temperature.<sup>8</sup>

### Whole-cell Patch-clamp Recording

Hippocampal slices were placed in a recording chamber and continuously perfused with extracellular solution at 2 ml/min. Pyramidal neurons in the hippocampal cornu ammonis region were directly visualized and identified by their shape and size with infrared differential interference contrast imaging microscopy. Whole-cell voltage-clamp recordings were applied to record sodium currents. Electrophysiologic recordings were conducted using an Axopatch 200B amplifier, 1,440 Digidata and coupled with pClamp 10.2 software (Molecular Devices, USA). Currents were sampled at 20 kHz and filtered at 5 kHz. The external solution was the same as the incubation solution but supplemented with 25 mM TEA-Cl to block potassium currents. The resistance of glass pipettes was 3 to 4 MΩ and the internal pipette solution contained (in mM): 110 CsF, 9 NaCl, 1.8 MgCl<sub>2</sub>, 4 Mg-ATP, 0.3 Na-GTP, 0.09 EGTA, 0.018 CaCl<sub>2</sub>, 9 HEPES, 10 TEA-Cl. CsOH was used to adjust to pH = 7.38 (290 to 310 mOsm). Tetrodotoxin-sensitive currents were confirmed by subtraction after application of 500 nM tetrodotoxin. Series resistance was compensated by approximately 70 to 75%, and cells were rejected when series resistance exceeded 15 MΩ. Action potentials were recorded under current-clamp mode with an extracellular solution containing (in mM): 125 NaCl, 25 NaHCO<sub>3</sub>, 1.25 NaH<sub>2</sub>PO<sub>4</sub>, 2.5 KCl, 1 MgCl<sub>2</sub>, 2 CaCl<sub>2</sub>, 15 glucose, and 10 μM bicuculline or 100 μM picrotoxin to block possible effects from γ-aminobutyric acid-mediated (GABAergic) inputs. The internal pipette solution for current-clamp mode contained (in mM): 122 K-methanesulfonate, 9 NaCl, 1.8 MgCl<sub>2</sub>, 4 Mg-ATP, 0.3 Na-GTP, 0.09 EGTA, 0.018 CaCl<sub>2</sub>, and 9 HEPES (pH adjusted to 7.35 with KOH, 290 to 310 mOsm).

### Statistical Analysis

No power calculations were conducted before the study. Sample sizes were based on our experience with similar experimental designs. No data were lost, but data were not collected when cell series resistance exceeded 15 MΩ.

Electrophysiologic data were analyzed using Clampfit 10.0 software (Molecular Devices), Graph-Pad Prism 6 (Graph-Pad Software Inc., USA), and Origin 10.0 (OriginLab, USA). Half-maximal inhibitory concentration ( $IC_{50}$ ) values were obtained by least squares fitting to the Hill equation:  $Y = 1 / (1 + 10^{(\log IC_{50} - X) \cdot h})$ , where  $Y$  is the effect,  $X$  is the measured concentration of isoflurane, and  $h$  is the Hill slope. For transient sodium currents, voltage-dependence of half-maximal activation and half-maximal inactivation were fitted to the Boltzmann equation:  $G/G_{\max} = 1 / [1 + \exp(V_{1/2} - V/k)]$ , where  $G$  = conductance,  $G/G_{\max}$  = normalized conductance;  $V_{1/2}$  = voltage of half-maximal activation or inactivation, and  $k$  = slope factor. Sodium current recovery traces and time constants ( $\tau$ ) were determined by fitting to the mono-exponential function:  $Y = \exp(-\tau \cdot n) + A_p$ , where  $\tau$  is the time constant,  $A_p$  is the plateau, and  $n$  is stimulus number based on complete recovery time. Inhibition of peak transient sodium current was normalized as %inhibition *versus* control and compared by chi-square test. For persistent sodium currents,

currents were measured as the preserved currents from 450 to 475 ms after stimulus. Resurgent sodium current refers to the peak current during the first 50 ms following step back. Both persistent and resurgent sodium currents were corrected for each individual trace by subtracting current recorded in the presence of tetrodotoxin. Normal distribution of data was tested by the Shapiro–Wilk test. All data are presented as mean  $\pm$  SD. Repeated measures data were analyzed by two-way ANOVA with Bonferroni *post hoc* testing. Two-tailed independent-samples or paired Student's *t* test were used for comparison between control and isoflurane conditions. Statistical significance was set as  $P < 0.05$ .

## Results

### Isoflurane Inhibits Transient Sodium Channel Current

Transient sodium channel current was activated by depolarization to 0 mV from holding potentials of  $-70$  or  $-120$  mV. At a clinically relevant concentration ( $0.55$  mM,  $\sim 2$

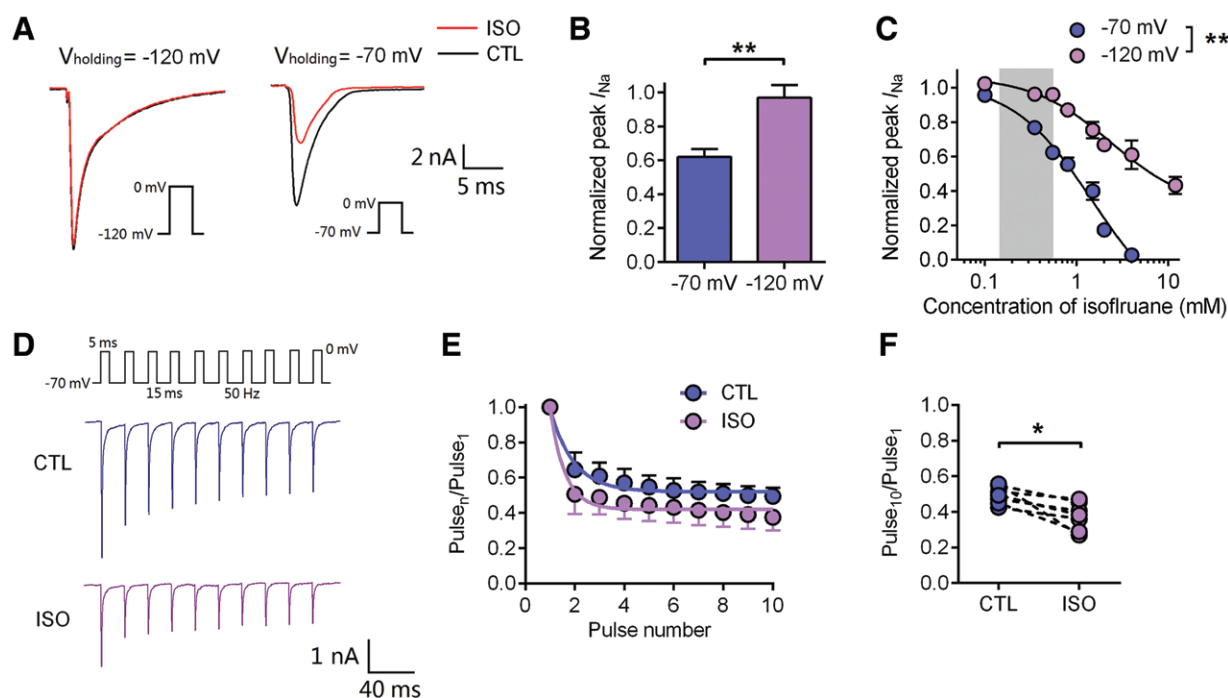

**Fig. 1.** Isoflurane inhibits sodium currents in a voltage- and activity-dependent manner. (A and B) Representative current traces recorded from the same pyramidal neuron before and after isoflurane at a clinically relevant concentration ( $0.55$  mM,  $\sim 2$  minimum alveolar concentration [MAC]) application from holding potentials of  $-70$  mV and  $-120$  mV (A), and the normalized inhibition (B) showing voltage-dependent inhibition of  $Na^+$  currents with greater inhibition by isoflurane from a holding potential of  $-120$  mV than of  $-70$  mV ( $n = 9$ ,  $P = 0.012$ ). (C) Concentration-effect curves of isoflurane on sodium currents from holding potentials of  $-70$  mV or  $-120$  mV, respectively. The shadow indicates clinically relevant concentrations of isoflurane ( $0.5$  to  $2$  MAC). The median inhibitory concentration ( $IC_{50}$ ) from a holding potential of  $-70$  mV was  $1.0 \pm 0.3$  mM ( $\sim 3.7$  MAC) and  $3.6 \pm 0.7$  mM ( $\sim 13.3$  MAC) at a holding potential of  $-120$  mV ( $n = 9$  to  $12$ ,  $P < 0.0001$ ). (D through F) Activity-dependent inhibition by isoflurane. (d) Representative currents from the same neuron before (top) and after (bottom) isoflurane. (E and F) Normalized sodium currents (E) and the last pulse (F) from individual normalized currents ( $Pulse_{10}/Pulse_1$ ) in the absence or presence of isoflurane ( $n = 7$ ,  $P = 0.010$ ). Data are mean  $\pm$  SD. \* $P < 0.05$ , \*\* $P < 0.01$ . Analyzed by two-tailed unpaired *t* test (B), two-tailed paired *t* test (F). CTL, control; ISO, isoflurane.

MAC), isoflurane inhibited transient sodium channel current in a voltage-dependent manner (fig. 1A). Inhibition was significantly greater at the physiologic holding potential of  $-70$  mV ( $37.8\% \pm 4.6\%$  inhibition,  $n = 9$ ) than at a hyperpolarized holding potential of  $-120$  mV ( $3.1\% \pm 7.6\%$  inhibition,  $n = 9$ ,  $P = 0.012$  vs.  $-70$  mV; fig. 1B). The median inhibitory concentration of isoflurane for inhibition of transient sodium channel current was  $1.0 \pm 0.3$  mM ( $\sim 3.7$  MAC) from a holding potential of  $-70$  mV, whereas the currents from a holding potential of  $-120$  mV were minimally inhibited (median inhibitory concentration =  $3.6 \pm 0.7$  mM,  $\sim 13.3$  MAC; fig. 1C). With repeated 5-ms pulses depolarizations at 50 Hz (fig. 1D), normalizing sodium channel current of each pulse to that of the first pulse ( $\text{Pulse}_n/\text{Pulse}_1$ ) removed the effect of resting block by

isoflurane.<sup>24</sup> Thus the reduced sodium channel current at the 10th pulse reflected activity-dependent inhibition as a result of repeated membrane depolarizations (fig. 1E). From a holding potential of  $-70$  mV, isoflurane reduced  $\text{Pulse}_{10}/\text{Pulse}_1$  ratio from  $0.49 \pm 0.02$  to  $0.38 \pm 0.03$  (fig. 1F,  $n = 7$ ,  $P = 0.010$ ). This suggests that isoflurane leads to progressive inhibition of sodium channel current during trains of action potentials as a result of delayed recovery from inactivation produced by isoflurane.

### Isoflurane Modulates Transient Sodium Channel Gating

To test the effects of isoflurane on voltage-gated sodium channel activation, sodium current was activated by a series of voltage steps from  $-70$  to  $+70$  mV preceded by a

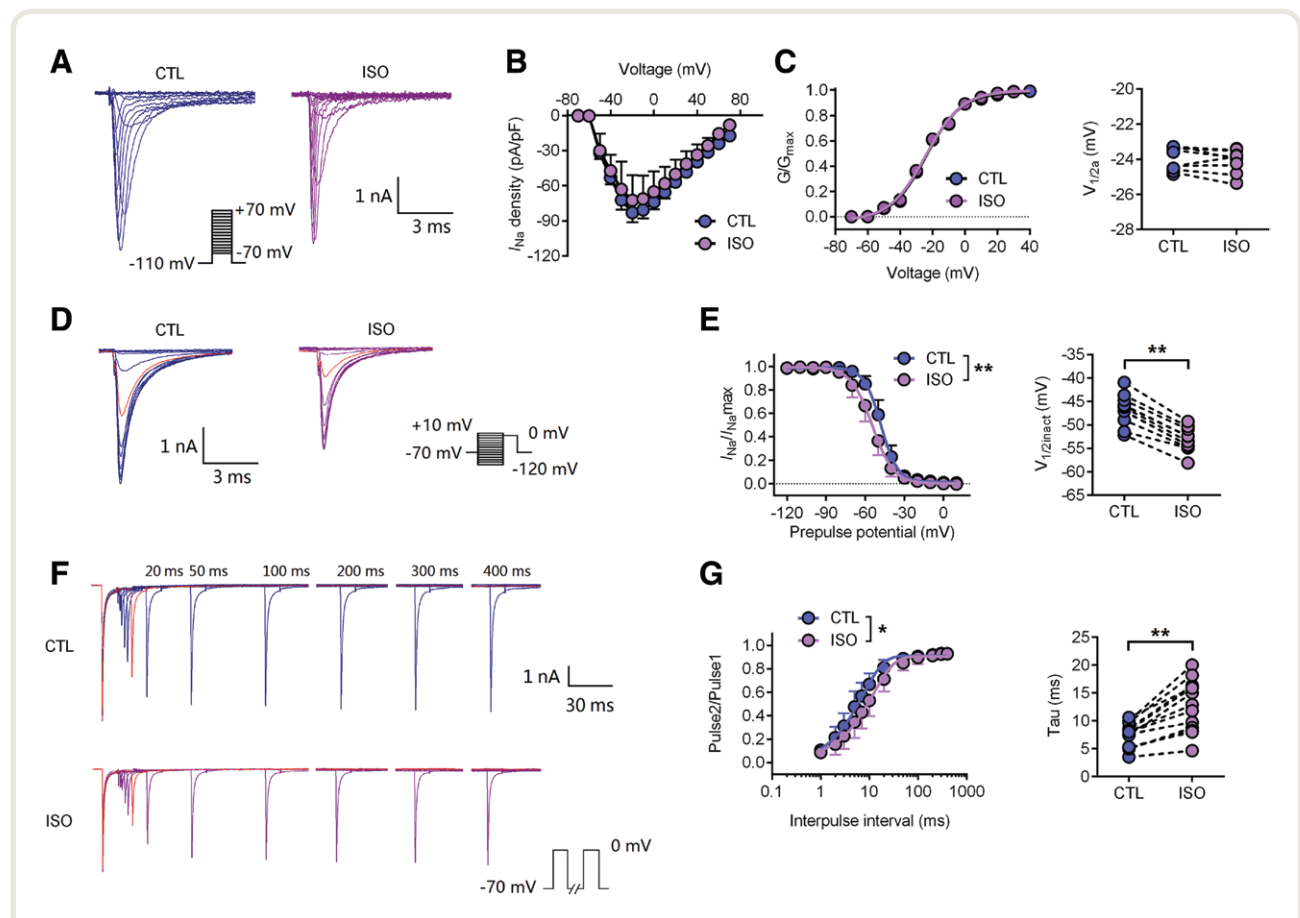

**Fig. 2.** Isoflurane modulates voltage-gated sodium channel gating. (A and B) Isoflurane at a clinically relevant concentration (0.42 mM,  $\sim 1.6$  minimum alveolar concentration [MAC]) does not alter the voltage-dependence of voltage-gated sodium channel activation. (A) Representative current traces recorded from the same pyramidal neuron before (left) and after (right) isoflurane application. (C) Voltage of half-maximal activation ( $V_{1/2\text{act}}$ ) was not altered by isoflurane ( $n = 8$ ;  $P = 0.144$ ). (D and E) Isoflurane shifts the voltage-dependence of voltage-gated sodium channel inactivation in the hyperpolarized direction. (D) Steady-state current curves recorded from the same neuron in the absence (left) or presence (right) of isoflurane. (E) Voltage of half-maximal inactivation ( $V_{1/2\text{inact}}$ ) is shifted in the hyperpolarized direction by isoflurane ( $n = 8$ ,  $P < 0.0001$ ). (F and G) Isoflurane significantly delays recovery from inactivation of voltage-gated sodium channels. (F) Traces recorded in the absence (top) or presence (bottom) of isoflurane using a paired-pulse protocol. (G) Normalized peak current was plotted against duration of the inter-pulse interval, which varied from 1 to 400 ms (inset), for CTL and ISO, and time constants were determined from mono-exponential fits for individual neuron data (left;  $n = 13$ ,  $P = 0.0002$ ). Data are mean  $\pm$  SD. \* $P < 0.05$ , \*\* $P < 0.01$  by two-tailed paired  $t$  test. CTL, control; ISO, isoflurane.



−110 mV prepulse to relieve channel inactivation (fig. 2A). Isoflurane at 0.42 mM (~1.6 MAC) did not shift the current–voltage relationship, and maximum sodium channel current for both control and isoflurane conditions occurred at −20 mV (fig. 2B). Voltage-dependent activation was unchanged by isoflurane: voltage-dependence of half-maximal activation was  $-23.9 \pm 0.2$  mV for control compared to  $-24.2 \pm 0.2$  mV with isoflurane (fig. 2C,  $n = 8$ ,  $P = 0.144$ ). The effect of isoflurane on steady-state inactivation was determined by eliciting currents at 0 mV after a 20-ms prepulse to voltages from −120 to +10 mV (fig. 2D). Normalized sodium channel current/maximum sodium channel current values reflected the fraction of channels inactivated during the prepulse.<sup>9</sup> Isoflurane (0.42 mM, ~1.6 MAC) shifted the steady-state inactivation curve in the hyperpolarizing direction; with a voltage of half-maximal inactivation of  $-46.7 \pm 0.9$  mV for control compared with  $-53.2 \pm 0.8$  mV with isoflurane (fig. 2E,  $n = 11$ ,  $P < 0.0001$ ). These data suggest that isoflurane inhibits peak sodium channel current by increasing the fraction of inactivated channels.

As neuronal firing frequency depends in part on how fast voltage-gated sodium channels can cycle through its various activation states, we measured the time-course of recovery from inactivation. Peak sodium channel current was recorded in response to two 10-ms pulses to 0 mV from a holding potential of −70 mV, where the duration between the two pulses was varied from 1 to 400 ms (fig. 2F). Recovery time-courses were fit to a mono-exponential function for both control and isoflurane conditions, indicating that channels predominantly entered a single fast-inactivated state.<sup>24</sup> Isoflurane increased the time required for channel recovery, with the recovery time constant increasing from  $7.5 \pm 0.6$  to  $12.7 \pm 1.3$  ms (fig. 2G,  $n = 13$ ,  $P < 0.0001$ ).

### Isoflurane Inhibits Persistent and Resurgent Sodium Currents

Persistent currents after fast-inactivated transient currents were recorded with 500-ms voltage steps from −70 to +20 mV (fig. 3A). The mean residual currents during 450 to 475 ms were calculated as persistent sodium currents.<sup>18</sup> The largest persistent currents were found at a voltage step to −40 mV (fig. 3B). Isoflurane inhibited persistent sodium currents at nearly all voltage steps from −60 to 0 mV (fig. 3C). The median inhibitory concentration of isoflurane for persistent sodium currents was  $0.4 \pm 0.1$  mM (~1.5 MAC) from a holding potential of −70 mV with depolarization to −40 mV (the voltage for maximal persistent currents; fig. 3D). Persistent sodium currents were corrected for each individual trace by subtracting current recorded in the presence of tetrodotoxin (500 nM). When persistent sodium current was evoked by a ramp depolarization stimulus (from −80 to 0 mV at 30 mV/s),<sup>28</sup> isoflurane decreased persistent sodium current density (fig. 3E and 3F,  $n = 11$ ). Persistent sodium current was tetrodotoxin-sensitive as it was inhibited completely by 500 nM tetrodotoxin (fig. 3E).

Resurgent sodium current is the residual fraction of the slow sodium current that can be activated by the next depolarization.<sup>16</sup> Isoflurane inhibited the resurgent current evoked by voltage steps from −70 to 0 mV with a 20-ms prepulse to +30 mV (fig. 3G–H,  $n = 7$ , all  $P < 0.05$  for voltages from −70 to −10 mV).

### Isoflurane Inhibits Sub-threshold Currents

Sodium currents at sub-threshold voltages determine the threshold of neuronal activation and are critical to synaptic transmission.<sup>29</sup> To test the effects of isoflurane on sub-threshold sodium currents, we applied successive 5-mV step depolarizations at the same rate as the ramp depolarization<sup>29</sup> (fig. 4A). Both transient and steady-state sodium channel current were evoked at these potentials. The largest transient and steady-state sodium channel current densities (current/conductance) were found at a voltage step to −60 mV, with current densities of  $-24.0 \pm 7.9$  and  $-2.0 \pm 0.3$  sodium channel current densities (current/conductance), respectively (fig. 4B). Isoflurane (0.42 mM, ~1.6 MAC) inhibited the transient sodium current at voltage steps to −50 and −45 mV, and steady-state sodium currents at voltage steps to −60 mV (fig. 4C and 4D,  $n = 9$ ).

### Isoflurane Depresses Action Potentials

Single action potential were evoked by injection of 60 pA current for 100 ms in current-clamp mode (fig. 5A). Isoflurane reduced action potential amplitude from  $104.5 \pm 5.1$  to  $90.0 \pm 3.0$  mV (fig. 5B left,  $n = 13$ ,  $P = 0.001$ ) and increased action potential width from  $2.3 \pm 0.2$  to  $2.6 \pm 0.2$  ms (fig. 5B right,  $n = 13$ ,  $P = 0.001$ ). By phase-plane plot voltage–time derivative analysis, isoflurane inhibited the whole time course of somatic spikes recorded from hippocampal cornu ammonis pyramidal neurons (fig. 5C). Firing of action potentials was activated by 1-s series of current injection from 120 to 60 pA (fig. 5D). Isoflurane reduced firing frequency from  $10.2 \pm 1.6$  to  $3.3 \pm 1.0$  Hz for 30 pA injections (fig. 5E,  $n = 20$ ,  $P = 0.0002$ ), from  $13.2 \pm 1.5$  to  $7.2 \pm 1.0$  Hz for 60 pA injections (fig. 5E,  $n = 20$ ,  $P < 0.0001$ ), and from  $12.5 \pm 1.5$  to  $7.6 \pm 1.0$  Hz for 90 pA injections (fig. 5E,  $n = 20$ ,  $P < 0.0001$ ). Isoflurane hyperpolarized the resting membrane potential from  $-54.6 \pm 2.3$  to  $-58.7 \pm 2.1$  mV (fig. 5F,  $n = 16$ ,  $P = 0.001$ ). Rheobase was increased by isoflurane from  $21.4 \pm 5.7$  to  $42.9 \pm 11.5$  pA (fig. 5G,  $n = 14$ ,  $P = 0.019$ ), and input resistance was increased from  $220 \pm 17$  to  $241 \pm 17$  M $\Omega$  (fig. 5H,  $n = 12$ ,  $P < 0.0001$ ). The effects of isoflurane on action potentials firing frequency, rheobase, neuronal input resistance, and resting membrane potential represent the combined results with recordings under bicuculline or picrotoxin.

### Discussion

Specific molecular targets mediate the neurophysiologic actions of general anesthetics on critical properties and

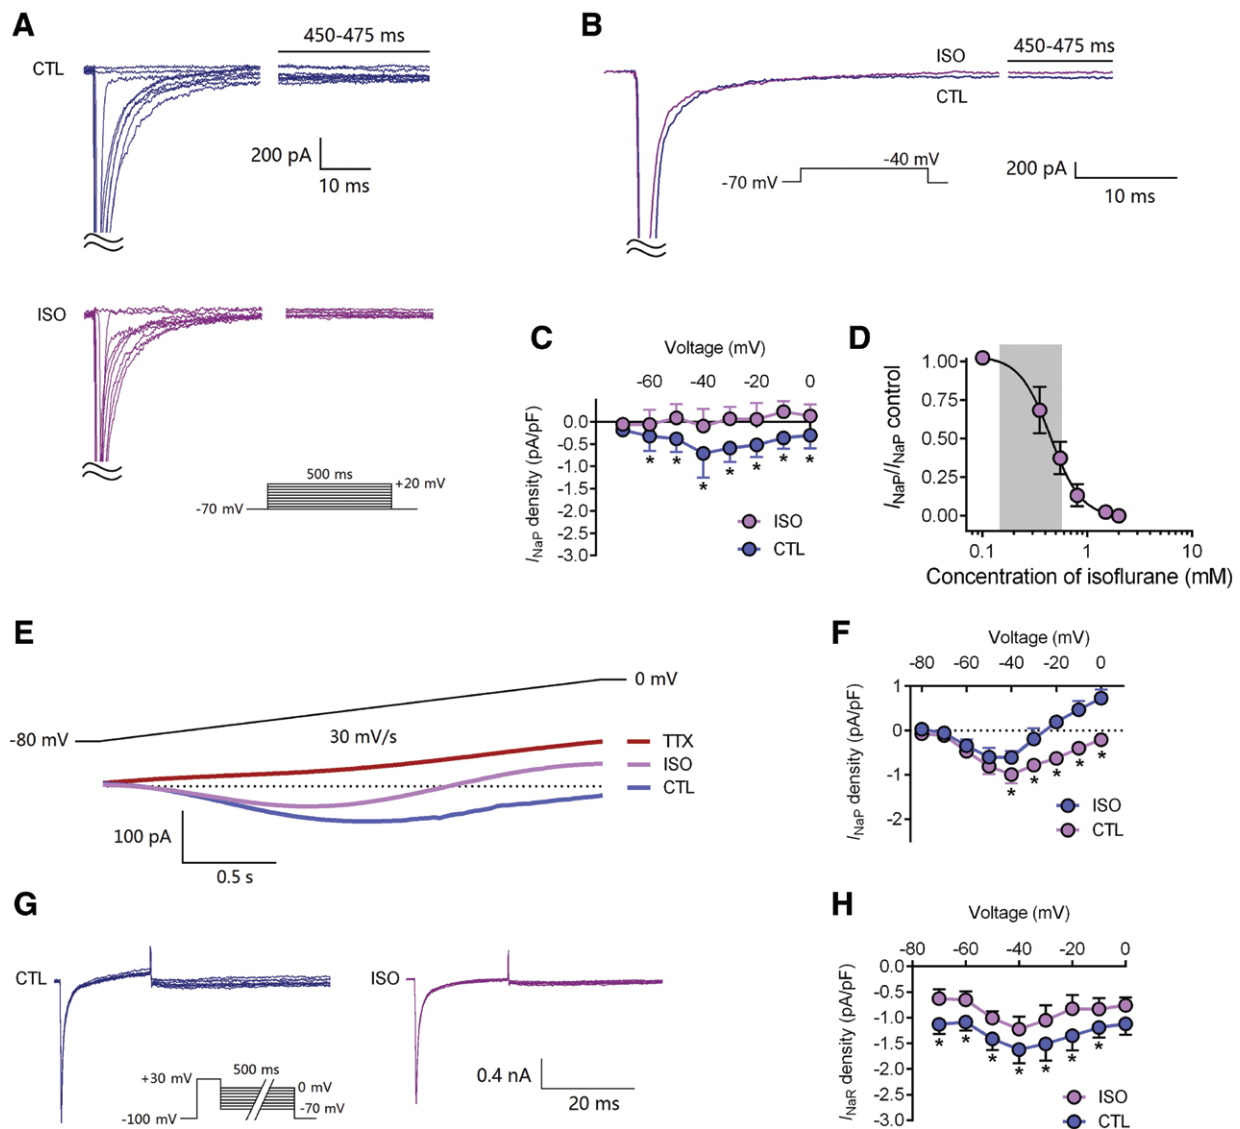

**Fig. 3.** Isoflurane inhibits persistent ( $I_{NaP}$ ) and resurgent ( $I_{NaR}$ ) sodium channel currents. (A through F) Isoflurane at a clinically relevant concentration (0.49 mM, ~1.8 minimum alveolar concentration [MAC]) inhibits  $I_{NaP}$  in pyramidal neurons. (A) Representative traces recorded from the same neuron using a prolonged step protocol shown in the inset ( $I_{NaP}$  was determined as the mean persistent currents from 450 to 475 ms). (B) The largest currents were elicited by depolarization to -40 mV; recordings before and after isoflurane perfusion are shown. (C) Density of  $I_{NaP}$  evoked by depolarization from -70 mV to 0 mV ( $n = 7$ ). (D) Concentration-effect curve of isoflurane for  $I_{NaP}$  from a holding potential of -70 mV. The shading indicates clinically relevant concentrations of isoflurane (0.5 to 2 MAC). (E) Mean  $I_{NaP}$  curves obtained from seven neurons, evoked with a ramp protocol from -80 mV to 0 mV (30 mV/s). (F) Isoflurane reduced the density of  $I_{NaP}$ . (G and H) Representative resurgent sodium currents (G) and density (H) indicates that isoflurane depressed  $I_{NaR}$  in pyramidal neurons ( $n = 17$ ).  $I_{NaR}$  refers to the peak current during the first 50 ms following step back. Data are mean  $\pm$  SD. \* $P < 0.05$  by two-way ANOVA. CTL, control; ISO, isoflurane.

processes such as neuronal excitability, axonal conduction, and synaptic transmission.<sup>30,31</sup> Voltage-gated sodium channels are essential ion channels in mediating the rising phase of action potentials<sup>13,32</sup> and are implicated as presynaptic targets for general anesthetics.<sup>3</sup> Although early studies on the squid giant axon found that action potentials were relatively insensitive to clinical concentrations of general anesthetics,<sup>33</sup> more recent studies

report significant sensitivity of sodium channels to volatile anesthetics at clinically relevant concentrations.<sup>9,34</sup> Supporting *in vivo* animal studies show that intravenous administration of the voltage-gated sodium channels blocker lidocaine reduces MAC for several volatile anesthetics both in animals and humans.<sup>35–37</sup> Moreover, intrathecal injection of tetrodotoxin reduces MAC for isoflurane in rats,<sup>35</sup> whereas intrathecal veratridine, a

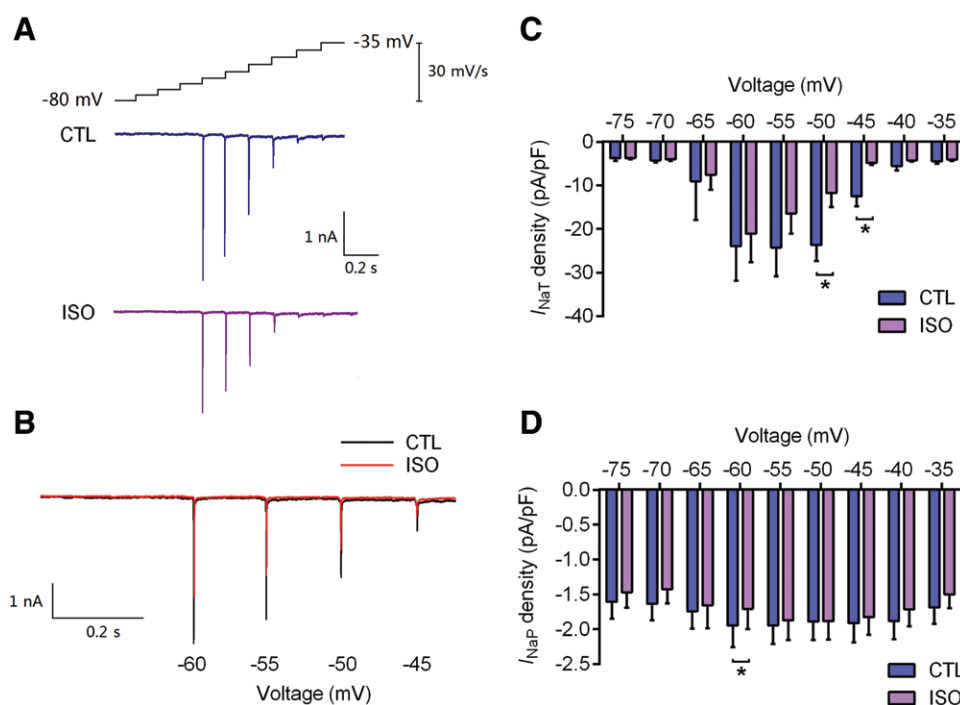

**Fig. 4.** Isoflurane modulates sub-threshold transient and persistent currents. (A) Representative currents recorded by a stair ramp protocol. Transient ( $I_{NaT}$ ) and state-steady persistent ( $I_{NaP}$ ) currents at each potential were calculated. (B) Sample of initial part of recording.  $I_{NaT}$  was inhibited by isoflurane at a clinically relevant concentration (0.42 mM, ~1.6 minimum alveolar concentration [MAC],  $n = 8$ ,  $P = 0.047$ , and  $P = 0.011$ ) at potentials of  $-50$  and  $-45$  mV (C), whereas  $I_{NaP}$  was inhibited at a potential of  $-60$  mV (D,  $n = 9$ ,  $P = 0.044$ ). Data are mean  $\pm$  SD. \* $P < 0.05$  by two-way ANOVA. CTL, control; ISO, isoflurane.

toxin that promotes the voltage-gated sodium channels open state, increases MAC and antagonizes the effect of intrathecal tetrodotoxin.<sup>38</sup>

Volatile anesthetics including isoflurane and sevoflurane inhibit heterologously expressed recombinant brain voltage-gated sodium channels at clinical concentrations by selectively interacting with the inactivated state of the channel.<sup>31</sup> Our findings support and extend these findings by demonstrating effects of isoflurane on sodium channel current and action potentials in native hippocampal neurons *in situ*. Voltage- and activity-dependent inhibition of voltage-gated sodium channels by volatile anesthetics can be explained by preferential interaction with the inactivated state to impede transition from the inactivated state back to the resting state.<sup>24,31</sup> The median inhibitory concentration of isoflurane for inhibition of transient sodium channel currents from a holding potential of  $-70$  mV is relevant to the clinically used concentrations, whereas isoflurane did not inhibit transient sodium channel currents at clinically relevant concentrations from a holding potential of  $-120$  mV. Even perfusion with saturated isoflurane stock solution (12 to 14 mM, ~48 MAC) only depressed transient sodium channel current by ~60% from a holding potential of  $-120$  mV. The partial inactivation state sodium channels existing at a holding potential of  $-70$  mV can explain this result.

Volatile anesthetics including isoflurane also display activity-dependent inhibition of neuronal sodium channels in isolated rat neurophysiological nerve terminals,<sup>9</sup> neuroblastoma cells,<sup>24</sup> and dorsal root ganglion neurons,<sup>10</sup> and in the bacterial voltage-gated sodium channels homologue voltage-gated sodium channel of *Bacillus halodurans*,<sup>39,40</sup> but there was no previous evidence that volatile anesthetics directly depress activity of excitatory neurons by inhibiting neuronal sodium channels.

The major anion in our pipette solution was fluorine, which has been reported to affect inactivation of voltage-gated sodium channels in squid giant axons.<sup>41</sup> We used fluorine instead of chlorine in the pipette solution for voltage-gated sodium channels recordings<sup>7,42</sup> to avoid changes in intracellular chlorine that might affect neuronal excitability, signaling, and plasticity of hippocampal pyramidal neurons.<sup>43,44</sup> Since isoflurane may also potentiate chlorine permeable  $\gamma$ -aminobutyric acid type A receptors, the level of intracellular chlorine has important consequences for its actions in a manner similar to that recently shown for propofol.<sup>45,46</sup>

We provide evidence that isoflurane at clinically relevant concentrations inhibits transient sodium channel currents, persistent sodium currents, and resurgent sodium currents at physiologic holding potentials in mouse hippocampal cornu ammonis pyramidal neurons. For transient sodium

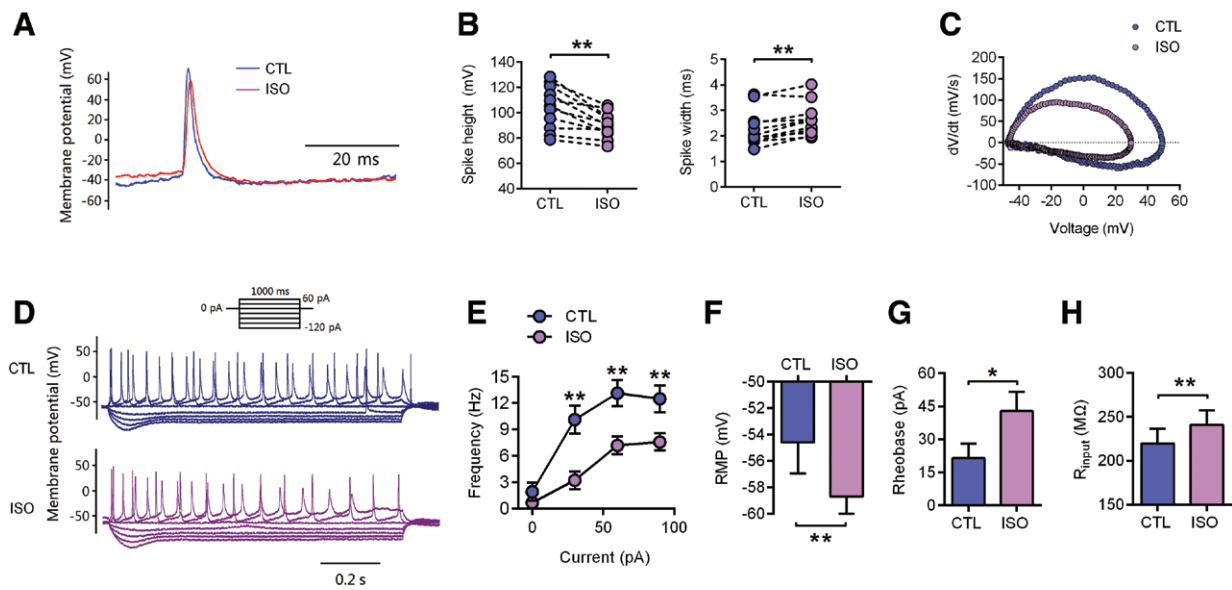

**Fig. 5.** Effects of isoflurane on hippocampal action potentials. (A) The effects of isoflurane at a clinically relevant concentration (0.48 mM,  $\sim 1.8$  minimum alveolar concentration [MAC]) on single action potentials. (B) Action potential amplitude was reduced and width increased by isoflurane ( $n = 13$ ,  $P = 0.001$ ), as illustrated by the action potential dynamics of voltage-time derivative (C). (D and E) Isoflurane significantly reduced action potential frequency ( $n = 20$ ). (F) Isoflurane significantly hyperpolarized pyramidal neuron resting membrane potential ( $n = 16$ ,  $P = 0.001$ ). (G) Isoflurane significantly increased the rheobase that evoked action potentials ( $n = 14$ ,  $P = 0.019$ ). (H) Isoflurane significantly increased the input resistant of neurons ( $n = 12$ ,  $P < 0.0001$ ). Data are mean  $\pm$  SD. \* $P < 0.05$ , \*\* $P < 0.01$  by two-tailed paired  $t$  test (b, g, h) or two-way ANOVA (E). CTL, control; ISO, isoflurane.

channel current, isoflurane inhibits peak sodium current and modulates channel gating by shifting the voltage-dependence of voltage-gated sodium channels inactivation, and by delaying recovery from inactivation. Isoflurane also inhibits persistent sodium currents and resurgent sodium currents at clinically relevant concentrations.<sup>6,47</sup> From a holding potential of  $-70$  mV, the median inhibitory concentration of isoflurane for persistent sodium current inhibition was lower than for transient sodium channel current ( $0.4 \pm 0.1$  vs.  $1.0 \pm 0.3$  mM), indicating that isoflurane selectively inhibits the persistent currents of sodium channels. This inhibition by isoflurane of persistent sodium current at clinically relevant concentrations might reduce neuronal excitability such as lower action potentials firing frequency and increased rheobase.

At least three activation states have been identified for neuronal sodium channels depending on membrane potential: resting (closed), activated (open), and inactivated.<sup>16</sup> Transient sodium channel currents are evoked by step depolarization and rapidly activate, whereas the subsequent residual sodium currents that last throughout the step are referred to as persistent sodium currents.<sup>17</sup> Upon repolarization, closed voltage-gated sodium channels reopen to produce resurgent currents, known as resurgent sodium currents.<sup>16</sup> Although these three components of sodium currents all flow through the same channels, they have

different kinetics and physiologic roles. Transient sodium channel currents are pivotal for initiation and propagation of action potentials,<sup>32</sup> whereas persistent sodium currents and resurgent sodium currents amplify responses of neurons to synaptic input and enhance repetitive firing.<sup>18</sup> The rapid kinetics and all-or-none properties of transient sodium channel currents mediate the upstroke of fast neuronal action potentials.<sup>13</sup> Persistent and resurgent sodium currents are activated by small synaptic depolarization and are slower than transient sodium channel currents. Despite their small amplitudes compared with transient sodium channel currents, persistent and resurgent sodium currents can profoundly alter neuronal firing behavior, especially at subthreshold voltages.<sup>16,17</sup> In dendrites, persistent sodium currents can boost distal synaptic potentials to propagate to the neuronal soma.<sup>15</sup> In proximal axons and peripheral axons, persistent sodium currents can affect initiation of action potentials.<sup>48,49</sup> Both persistent and resurgent sodium currents also play critical roles in the regulation of neuronal firing behavior because of their high densities near the axon initial segment.<sup>50</sup> Resurgent sodium current is enhanced by specific pathogenic mutations in sodium channels, thereby increasing action potential firing rate and duration, causing neuronal hyperexcitability.<sup>51</sup> Inhibition by isoflurane of these neuronal sodium channel currents provides neurophysiologic mechanisms to support previous reports that



isoflurane reduces excitability of cornu ammonis pyramidal neurons by depressing action potentials.

Neuronal information coding occurs by varying frequencies and patterns of action potentials between somata and axons, where they can rapidly propagate information over distance. Action potentials are fundamentally important for synaptic transmission and neuroplasticity.<sup>52,53</sup> Neurotransmitter release is largely determined by the shape, frequency, and pattern of presynaptic action potentials during the process of information transfer.<sup>14</sup> Release of many neurotransmitters is inhibited by volatile anesthetics in a sodium channel-dependent manner.<sup>54,55</sup> Thus voltage-gated sodium channels is a plausible presynaptic molecular target for volatile anesthetics.

Isoflurane decreased excitability of mouse cornu ammonis pyramidal neurons by shaping the action potentials and hyperpolarizing the resting membrane potential. The generation of action potentials depends on multiple ion channels including voltage-gated sodium channels for rapid depolarization, voltage-gated calcium channels for slow depolarization, and potassium channels for repolarization.<sup>56</sup> Analysis of action potential kinetics (voltage-time derivative) showed that isoflurane slowed action potential kinetics throughout, consistent with net inhibition. Isoflurane decreased action potential amplitude mainly from inhibition of transient voltage-gated sodium channel currents, as seen in rat neurohypophyseal terminals.<sup>9</sup> Prolonged action potential duration impairs neuronal responses to high frequency stimuli, enhancing the depression of synaptic transmission. The increased action potential half-width by isoflurane is likely attributable to inhibition of potassium channels.<sup>57</sup> Isoflurane at clinical concentrations can enhance and stabilize the inactivation state of voltage-gated sodium channels, resulting in activity-dependent reduction of sodium channel current with high-frequency stimuli, which could partly contribute to slow the rapid depolarization of action potential by isoflurane. Inhibition by isoflurane of persistent sodium channel current may also contribute to its effect on action potential amplitude and duration. Isoflurane slightly hyperpolarized resting membrane potential possibly as a result of enhancement of volatile anesthetic-sensitive background K<sup>+</sup> channels.<sup>58</sup> The effects of isoflurane on resting membrane potential have been reported to be varied<sup>47,59</sup> and voltage-dependent;<sup>60</sup> expression of different K<sup>+</sup> channel subtypes may contribute to these differential effects.<sup>58</sup>

In conclusion, isoflurane can inhibit three components of sodium channel current, which contribute to its depression of neuronal excitability and action potentials in hippocampal cornu ammonis pyramidal neurons. Voltage-dependent and activity-dependent inhibition by isoflurane, and possibly other volatile anesthetics, depresses neuronal excitability and may contribute to anesthetic effects on neurotransmitter release and synaptic plasticity.

## Research Support

Supported by grant No. 81771486 (to Dr. Zhou) and No. 81600918 (to Dr. Liang) from the National Natural Science Foundation of China (Beijing, China), and grant No. R01 GM-58055 from the National Institutes of Health (Bethesda, Maryland; to Dr. Hemmings).

## Competing Interests

The authors declare no competing interests.

## Correspondence

Address correspondence to Dr. Zhou: Laboratory of Anesthesia and Critical Care Medicine, Translational Neuroscience Center, West China Hospital of Sichuan University, Chengdu, 610041, Sichuan, China P.R. E-mail: zhouc@163.com. Information on purchasing reprints may be found at [www.anesthesiology.org](http://www.anesthesiology.org) or on the masthead page at the beginning of this issue. ANESTHESIOLOGY's articles are made freely accessible to all readers, for personal use only, 6 months from the cover date of the issue.

## References

1. Hemmings HC Jr, Akabas MH, Goldstein PA, Trudell JR, Orser BA, Harrison NL: Emerging molecular mechanisms of general anesthetic action. *Trends Pharmacol Sci* 2005; 26:503–10
2. Franks NP: General anaesthesia: From molecular targets to neuronal pathways of sleep and arousal. *Nat Rev Neurosci* 2008; 9:370–86
3. Doi M, Ikeda K: Respiratory effects of sevoflurane. *Anesth Analg* 1987; 66:241–4
4. Karanovic N, Pecotic R, Valic M, Jeroncic A, Carev M, Karanovic S, Ujevic A, Dogas Z: The acute hypoxic ventilatory response under halothane, isoflurane, and sevoflurane anaesthesia in rats. *Anaesthesia* 2010; 65:227–34
5. Bi SS, Deng CH, Zhou TY, Guan Z, Li L, Li HQ, Zhang LP, Yang L, Lu W: Remifentanyl-sevoflurane interaction models of circulatory response to laryngoscopy and circulatory depression. *Br J Anaesth* 2013; 110:729–40
6. Westphalen RI, Hemmings HC Jr: Volatile anesthetic effects on glutamate *versus* GABA release from isolated rat cortical nerve terminals: Basal release. *J Pharmacol Exp Ther* 2006; 316:208–15
7. Herold KF, Nau C, Ouyang W, Hemmings HC Jr: Isoflurane inhibits the tetrodotoxin-resistant voltage-gated sodium channel Nav1.8. *ANESTHESIOLOGY* 2009; 111:591–9
8. Yamada-Hanff J, Bean BP: Activation of I<sub>h</sub> and TTX-sensitive sodium current at subthreshold voltages during CA1 pyramidal neuron firing. *J Neurophysiol* 2015; 114:2376–89

9. Ouyang W, Wang G, Hemmings HC Jr: Isoflurane and propofol inhibit voltage-gated sodium channels in isolated rat neurohypophyseal nerve terminals. *Mol Pharmacol* 2003; 64:373–81
10. Scholz A, Appel N, Vogel W: Two types of TTX-resistant and one TTX-sensitive Na<sup>+</sup> channel in rat dorsal root ganglion neurons and their blockade by halothane. *Eur J Neurosci* 1998; 10:2547–56
11. Pal D, Jones JM, Wisidagamage S, Meisler MH, Mashour GA: Reduced Nav1.6 sodium channel activity in mice increases *in vivo* sensitivity to volatile anesthetics. *PLoS One* 2015; 10:e0134960
12. Baumgart JP, Zhou ZY, Hara M, Cook DC, Hoppa MB, Ryan TA, Hemmings HC Jr: Isoflurane inhibits synaptic vesicle exocytosis through reduced Ca<sup>2+</sup> influx, not Ca<sup>2+</sup>-exocytosis coupling. *Proc Natl Acad Sci U S A* 2015; 112:11959–64
13. Bean BP: The action potential in mammalian central neurons. *Nat Rev Neurosci* 2007; 8:451–65
14. Deng PY, Rotman Z, Blundon JA, Cho Y, Cui J, Cavalli V, Zakharenko SS, Klyachko VA: FMRP regulates neurotransmitter release and synaptic information transmission by modulating action potential duration via BK channels. *Neuron* 2013; 77:696–711
15. Crill WE: Persistent sodium current in mammalian central neurons. *Annu Rev Physiol* 1996; 58:349–62
16. Lewis AH, Raman IM: Resurgent current of voltage-gated Na(+) channels. *J Physiol* 2014; 592:4825–38
17. Stafstrom CE: Persistent sodium current and its role in epilepsy. *Epilepsy Curr* 2007; 7:15–22
18. Sittl R, Lampert A, Huth T, Schuy ET, Link AS, Fleckenstein J, Alzheimer C, Grafe P, Carr RW: Anticancer drug oxaliplatin induces acute cooling-aggravated neuropathy via sodium channel subtype Na(V)1.6-resurgent and persistent current. *Proc Natl Acad Sci U S A* 2012; 109:6704–9
19. Moser MB, Moser EI: Functional differentiation in the hippocampus. *Hippocampus* 1998; 8:608–19
20. Zhong T, Qing QJ, Yang Y, Zou WY, Ye Z, Yan JQ, Guo QL: Repression of contextual fear memory induced by isoflurane is accompanied by reduction in histone acetylation and rescued by sodium butyrate. *Br J Anaesth* 2014; 113:634–43
21. Lee BH, Hazarika OD, Quitoriano GR, Lin N, Leong J, Brosnan H, Chan JT, May LD, Yu D, Alkhamisi A, Stratmann G, Sall JW: Effect of combining anesthetics in neonates on long-term cognitive function. *Int J Dev Neurosci* 2014; 37:87–93
22. Lee BH, Chan JT, Hazarika O, Vutsits L, Sall JW: Early exposure to volatile anesthetics impairs long-term associative learning and recognition memory. *PLoS One* 2014; 9:e105340
23. Hotson JR, Prince DA, Schwartzkroin PA: Anomalous inward rectification in hippocampal neurons. *J Neurophysiol* 1979; 42:889–95
24. Purtell K, Gingrich KJ, Ouyang W, Herold KF, Hemmings HC Jr: Activity-dependent depression of neuronal sodium channels by the general anaesthetic isoflurane. *Br J Anaesth* 2015; 115:112–21
25. Ouyang W, Herold KF, Hemmings HC Jr: Comparative effects of halogenated inhaled anesthetics on voltage-gated Na<sup>+</sup> channel function. *ANESTHESIOLOGY* 2009; 110:582–90
26. Taheri S, Halsey MJ, Liu J, Eger EI 2<sup>nd</sup>, Koblin DD, Laster MJ: What solvent best represents the site of action of inhaled anesthetics in humans, rats, and dogs? *Anesth Analg* 1991; 72:627–34
27. Franks NP, Lieb WR: Selective actions of volatile general anaesthetics at molecular and cellular levels. *Br J Anaesth* 1993; 71:65–76
28. Lunko O, Isaev D, Maximyuk O, Ivanchick G, Sydorenko V, Krishtal O, Isaeva E: Persistent sodium current properties in hippocampal CA1 pyramidal neurons of young and adult rats. *Neurosci Lett* 2014; 559:30–3
29. Carter BC, Giessel AJ, Sabatini BL, Bean BP: Transient sodium current at subthreshold voltages: activation by EPSP waveforms. *Neuron* 2012; 75:1081–93
30. Ratnakumari L, Hemmings HC Jr: Inhibition of presynaptic sodium channels by halothane. *ANESTHESIOLOGY* 1998; 88:1043–54
31. Rehberg B, Xiao YH, Duch DS: Central nervous system sodium channels are significantly suppressed at clinical concentrations of volatile anesthetics. *ANESTHESIOLOGY* 1996; 84:1223–33; discussion 27A
32. Hodgkin AL, Huxley AF: A quantitative description of membrane current and its application to conduction and excitation in nerve. 1952. *Bull Math Biol* 1990; 52:25–71; discussion 5–23
33. Franks NP, Lieb WR: Molecular and cellular mechanisms of general anaesthesia. *Nature* 1994; 367:607–14
34. Herold KF, Hemmings HC Jr: Sodium channels as targets for volatile anesthetics. *Front Pharmacol* 2012; 3:50
35. Acevedo-Arcique CM, Ibancovich JA, Chavez JR, Gutierrez-Blanco E, Moran-Muñoz R, Victoria-Mora JM, Tendillo-Cortijo F, Santos-González M, Sanchez-Aparicio P: Lidocaine, dexmedetomidine and their combination reduce isoflurane minimum alveolar concentration in dogs. *PLoS One* 2014; 9:e106620
36. Moran-Muñoz R, Ibancovich JA, Gutierrez-Blanco E, Acevedo-Arcique CM, Victoria Mora JM, Tendillo FJ, Santos-Gonzalez M, Yamashita K: Effects of lidocaine, dexmedetomidine or their combination on the minimum alveolar concentration of sevoflurane in dogs. *J Vet Med Sci* 2014; 76:847–53
37. Hamp T, Krammel M, Weber U, Schmid R, Graf A, Plöchl W: The effect of a bolus dose of intravenous lidocaine on the minimum alveolar concentration of sevoflurane: A prospective, randomized, double-blinded, placebo-controlled trial. *Anesth Analg* 2013; 117:323–8

38. Zhang Y, Sharma M, Eger EI 2<sup>nd</sup>, Laster MJ, Hemmings HC Jr, Harris RA: Intrathecal veratridine administration increases minimum alveolar concentration in rats. *Anesth Analg* 2008; 107:875–8
39. Ouyang W, Jih TY, Zhang TT, Correa AM, Hemmings HC Jr: Isoflurane inhibits NaChBac, a prokaryotic voltage-gated sodium channel. *J Pharmacol Exp Ther* 2007; 322:1076–83
40. Sand RM, Gingrich KJ, Macharadze T, Herold KE, Hemmings HC Jr: Isoflurane modulates activation and inactivation gating of the prokaryotic Na<sup>+</sup> channel NaChBac. *J Gen Physiol* 2017; 149:623–38
41. Chandler WK, Hodgkin AL, Meves H: The effect of changing the internal solution on sodium inactivation and related phenomena in giant axons. *J Physiol* 1965; 180:821–36
42. Castelli L, Biella G, Toselli M, Magistretti J: Resurgent Na<sup>+</sup> current in pyramidal neurones of rat perirhinal cortex: Axonal location of channels and contribution to depolarizing drive during repetitive firing. *J Physiol* 2007; 582(Pt 3):1179–93
43. Raimondo JV, Richards BA, Woodin MA: Neuronal chloride and excitability: The big impact of small changes. *Curr Opin Neurobiol* 2017; 43:35–42
44. Kaila K, Price TJ, Payne JA, Puskarjov M, Voipio J: Cation-chloride cotransporters in neuronal development, plasticity and disease. *Nat Rev Neurosci* 2014; 15:637–54
45. Garcia PS, Kolesky SE, Jenkins A: General anesthetic actions on GABA(A) receptors. *Curr Neuropharmacol* 2010; 8:2–9
46. Puskarjov M, Fiumelli H, Briner A, Bodogan T, Demeter K, Laco CM, Mavrovic M, Blaesse P, Kaila K, Vutsits L: K-Cl cotransporter 2-mediated Cl<sup>-</sup> extrusion determines developmental stage-dependent impact of propofol anesthesia on dendritic spines. *ANESTHESIOLOGY* 2017; 126:855–67
47. Wu XS, Sun JY, Evers AS, Crowder M, Wu LG: Isoflurane inhibits transmitter release and the presynaptic action potential. *ANESTHESIOLOGY* 2004; 100:663–70
48. Astman N, Gutnick MJ, Fleidervish IA: Persistent sodium current in layer 5 neocortical neurons is primarily generated in the proximal axon. *J Neurosci* 2006; 26:3465–73
49. Tokuno HA, Kocsis JD, Waxman SG: Noninactivating, tetrodotoxin-sensitive Na<sup>+</sup> conductance in peripheral axons. *Muscle Nerve* 2003; 28:212–7
50. Yue C, Remy S, Su H, Beck H, Yaari Y: Proximal persistent Na<sup>+</sup> channels drive spike afterdepolarizations and associated bursting in adult CA1 pyramidal cells. *J Neurosci* 2005; 25:9704–20
51. Jarecki BW, Piekarczyk AD, Jackson JO 2<sup>nd</sup>, Cummins TR: Human voltage-gated sodium channel mutations that cause inherited neuronal and muscle channelopathies increase resurgent sodium currents. *J Clin Invest* 2010; 120:369–78
52. Hoppa MB, Gouzer G, Armbruster M, Ryan TA: Control and plasticity of the presynaptic action potential waveform at small CNS nerve terminals. *Neuron* 2014; 84:778–89
53. Poage RE, Zengel JE: Repolarization of the presynaptic action potential and short-term synaptic plasticity in the chick ciliary ganglion. *Synapse* 2002; 46:189–98
54. Westphalen RI, Desai KM, Hemmings HC Jr: Presynaptic inhibition of the release of multiple major central nervous system neurotransmitter types by the inhaled anaesthetic isoflurane. *Br J Anaesth* 2013; 110:592–9
55. Westphalen RI, Hemmings HC Jr: Selective depression by general anesthetics of glutamate *versus* GABA release from isolated cortical nerve terminals. *J Pharmacol Exp Ther* 2003; 304:1188–96
56. Storm JF: Potassium currents in hippocampal pyramidal cells. *Prog Brain Res* 1990; 83:161–87
57. Suzuki A, Aizawa K, Gassmayr S, Bosnjak ZJ, Kwok WM: Biphasic effects of isoflurane on the cardiac action potential: An ionic basis for anesthetic-induced changes in cardiac electrophysiology. *ANESTHESIOLOGY* 2002; 97:1209–17
58. Patel AJ, Honoré E, Lesage F, Fink M, Romey G, Lazdunski M: Inhalational anesthetics activate two-pore-domain background K<sup>+</sup> channels. *Nat Neurosci* 1999; 2:422–6
59. Wilde DW: Isoflurane reduces K<sup>+</sup> current in single smooth muscle cells of guinea pig portal vein. *Anesth Analg* 1996; 83:1307–13
60. MacIver MB, Kendig JJ: Anesthetic effects on resting membrane potential are voltage-dependent and agent-specific. *ANESTHESIOLOGY* 1991; 74:83–8
